# Supplementary material for: HybPhaser: A workflow for the detection and phasing of hybrids in target capture data sets
Source: PubMed Central journal article supplement — Appl Plant Sci. 2021 Jul 21;9(7):10.1002/aps3.11441. doi: 10.1002/aps3.11441 (PMC8312746; doi:10.1002/aps3.11441), 2021-07-21

**APPENDIX S10.** Gene tree summary phylogeny from data set including phased accessions.

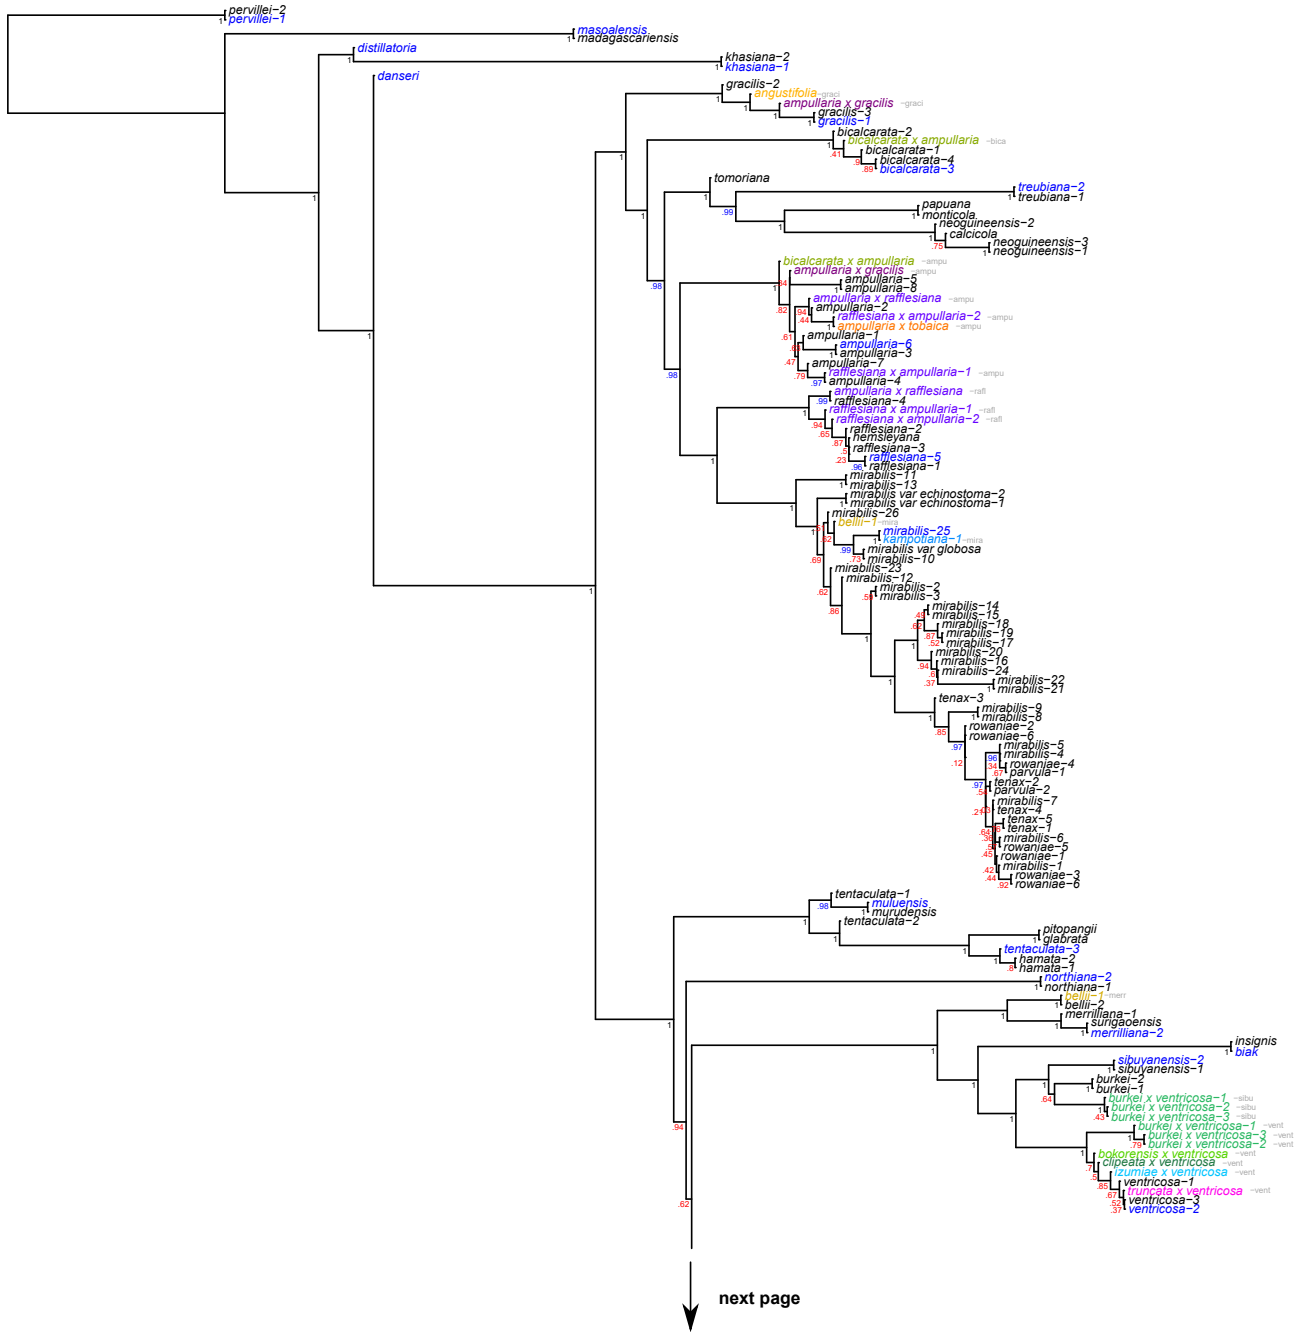

**Selected clade references**

**Phased accessions:**

confirmed hybrids

- ampullaria x gracilis*
- ampullaria x rafflesiana*
- ampullaria x tobaica*
- angustifolia*
- bellii-1*
- bicalcarata x ampullaria*
- bokorensis x ventricosa*
- burkei x ventricosa-1*
- burkei x ventricosa-2*
- burkei x ventricosa-3*

- clipeata x ventricosa*
- gymnamphora-2*
- izumiae x ventricosa*
- kamptiana-1*
- lowii x campanulata*
- rafflesiana x ampullaria-1*
- rafflesiana x ampullaria-2*
- truncata x ventricosa*
- veitchii x eymae*
- xiphioides-1*

not confirmed hybrids

- deaniana*
- rigidifolia*
- sanguinea-1*
- sanguinea-2*
- veitchii-1*

- clade reference used for phasing

**Node support**

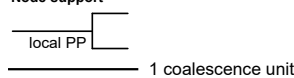

next page

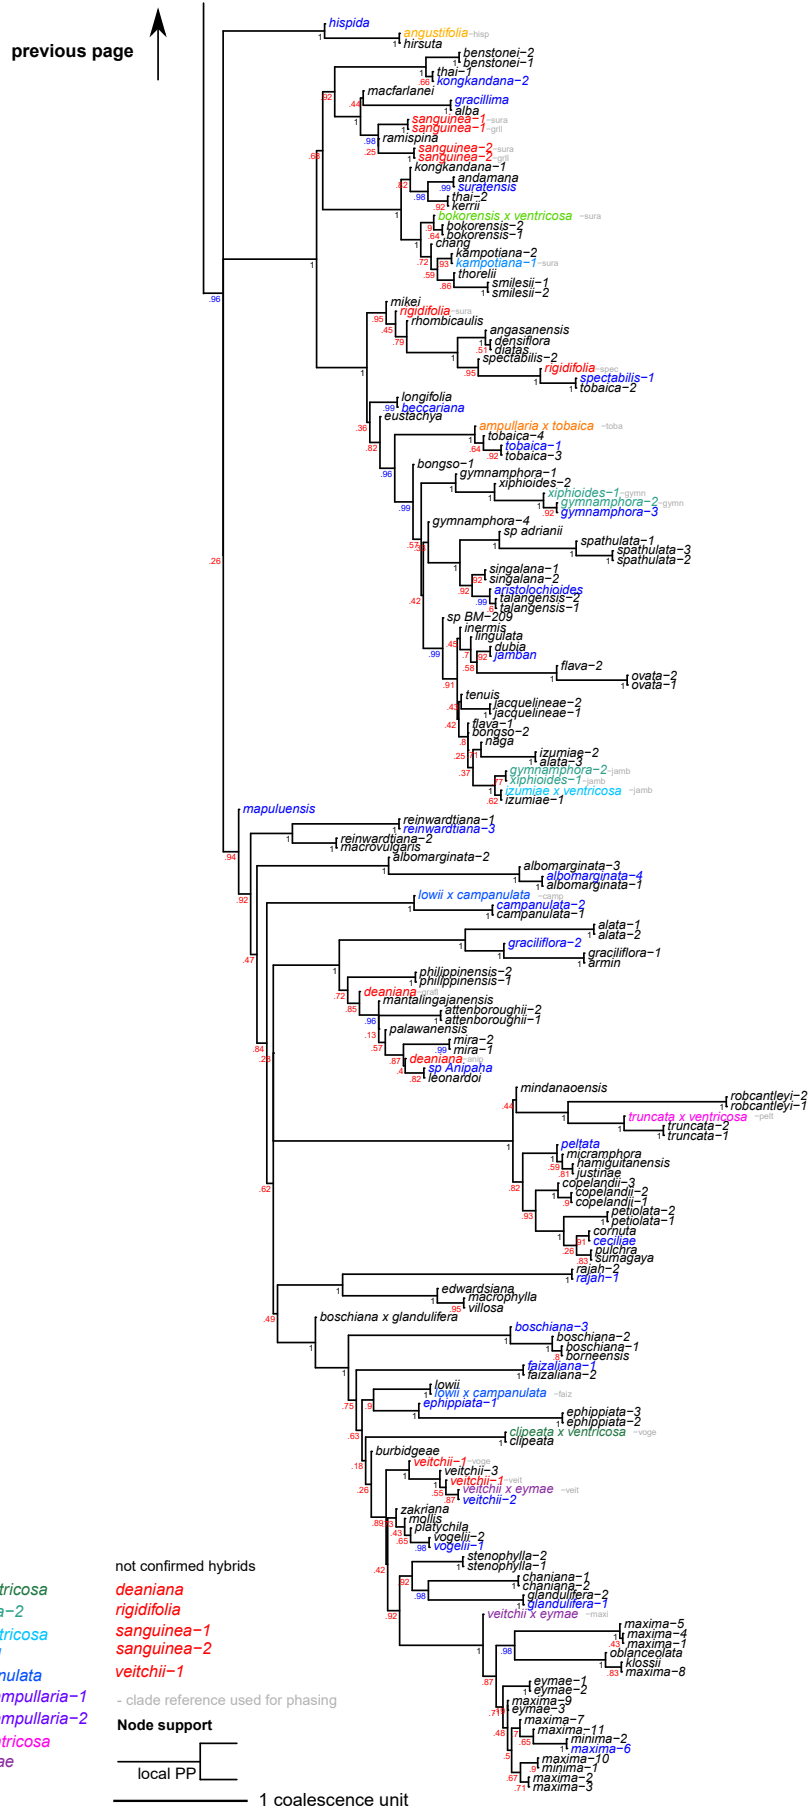

Supplement: APS3-9--s007.pdf [file APS3-9--s007.pdf]
