# Supplementary material for: HybPhaser: A workflow for the detection and phasing of hybrids in target capture data sets
Source: PubMed Central journal article supplement — Appl Plant Sci. 2021 Jul 21;9(7):10.1002/aps3.11441. doi: 10.1002/aps3.11441 (PMC8312746; doi:10.1002/aps3.11441), 2021-07-21
Supplement: APS3-9--s010.pdf [file APS3-9--s010.pdf]

**APPENDIX S8.** Graphs and tables from data set optimization and heterozygosity assessment of phased accessions.

**1. Data set optimization: Samples and loci removed to reduce missing data**

**Figure S1.** Graphical overview of recovered data and chosen thresholds.

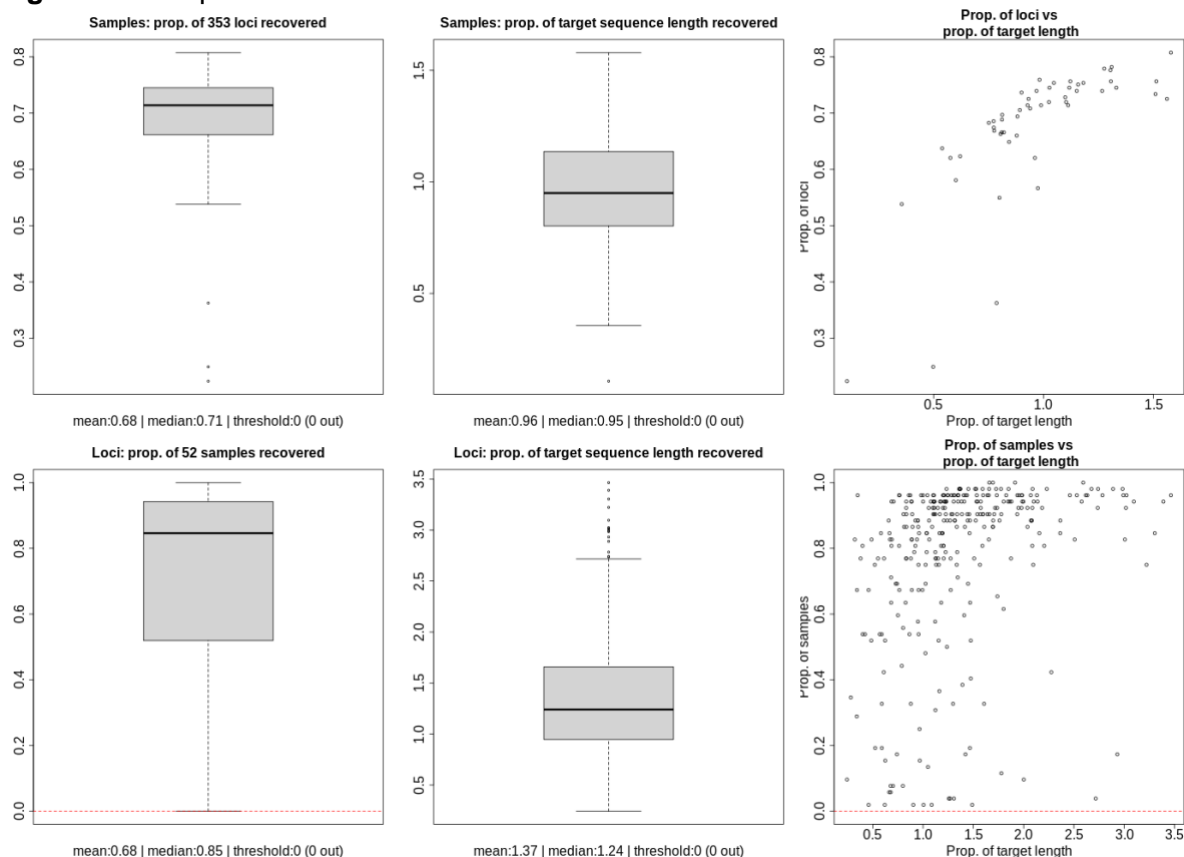

Sixty-six loci are below the threshold (0.2) for proportion of recovered samples:

4744, 5034, 5038, 5064, 5177, 5260, 5271, 5328, 5339, 5348, 5354, 5357, 5422, 5513, 5660, 5733, 5802, 5815, 5822, 5843, 5893, 5936, 5941, 5944, 5990, 6026, 6050, 6056, 6114, 6148, 6150, 6164, 6270, 6398, 6401, 6406, 6407, 6430, 6447, 6448, 6457, 6506, 6514, 6526, 6540, 6557, 6565, 6705, 6732, 6780, 6785, 6791, 6864, 6886, 6893, 6954, 6969, 6977, 6995, 7013, 7024, 7135, 7194, 7296, 7325, 7361

Eleven loci are below the threshold (0.45) for proportion of recovered target sequence length:

| Locus | Proportion of recovered target sequence length |
|-------|------------------------------------------------|
| 4793  | 0.384                                          |
| 5264  | 0.394                                          |
| 5273  | 0.25                                           |
| 5333  | 0.338                                          |

|      |       |
|------|-------|
| 5339 | 0.288 |
| 5670 | 0.326 |
| 5816 | 0.386 |
| 5921 | 0.347 |
| 6363 | 0.406 |
| 6544 | 0.341 |
| 7128 | 0.434 |

In total, 76 loci were removed: 4744, 5034, 5038, 5064, 5177, 5260, 5271, 5328, 5339, 5348, 5354, 5357, 5422, 5513, 5660, 5733, 5802, 5815, 5822, 5843, 5893, 5936, 5941, 5944, 5990, 6026, 6050, 6056, 6114, 6148, 6150, 6164, 6270, 6398, 6401, 6406, 6407, 6430, 6447, 6448, 6457, 6506, 6514, 6526, 6540, 6557, 6565, 6705, 6732, 6780, 6785, 6791, 6864, 6886, 6893, 6954, 6969, 6977, 6995, 7013, 7024, 7135, 7194, 7296, 7325, 7361, 4793, 5264, 5273, 5333, 5670, 5816, 5921, 6363, 6544, 7128

The average number of missing samples for all loci is: 4.67 (of 25 samples)

The median number of missing samples for all loci is: 2 (of 25 samples)

The chosen threshold for removing loci with missing data is: none

0 loci will be removed.

Cleaning step 1c: missing data (loci) of samples

The average number of missing loci for all samples is: 56.08 (of 300 loci)

The median number of missing loci for all samples is: 51 (of 300 loci)

The chosen threshold for removing samples with missing data is: none.

Cleaning step 1d: Combined sequence length recovered for each sample

The total length of combined target sequences is: 288,822 bp. The average proportion of targets length recovered is: 0.94. The median number of missing loci for all samples is: 0.94.

The chosen threshold for proportion of combined target length to exclude low recovery samples: none.

## 2. Data set optimization: Putative paralogous genes

### Paralogs for all accessions

For the phased accessions the same loci were removed that were flagged and removed as putative paralogs for all in the previous data set optimization step for all samples.

**Figure S2.** Bar graph and boxplot of mean proportion of SNPs across all samples for each locus. Red bars show outlier loci that are removed from the data set.

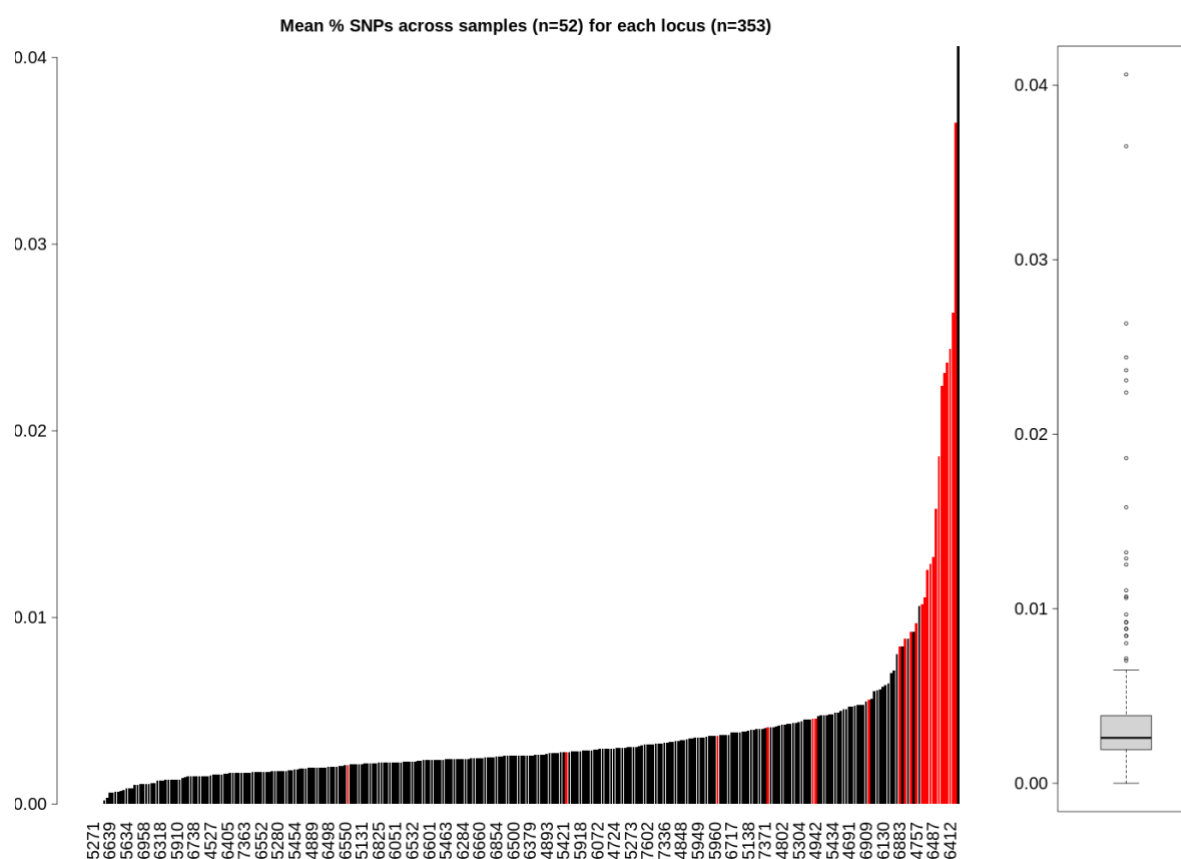

The 24 putative paralogous accessions from the HybPhaser data set optimization step for the original data set were removed:

6412, 6227, 5968, 4471, 6679, 6954, 4757, 5899, 5865, 4806, 6487, 6404, 6563, 6038, 7367, 6274, 5870, 7111, 6883, 5347, 5943, 6373, 4942, 6488.

### Paralogs for each accession

**Figure S3.** Boxplots of the distribution of values for SNPs of each locus for each sample. Outlier loci are shown as dots.

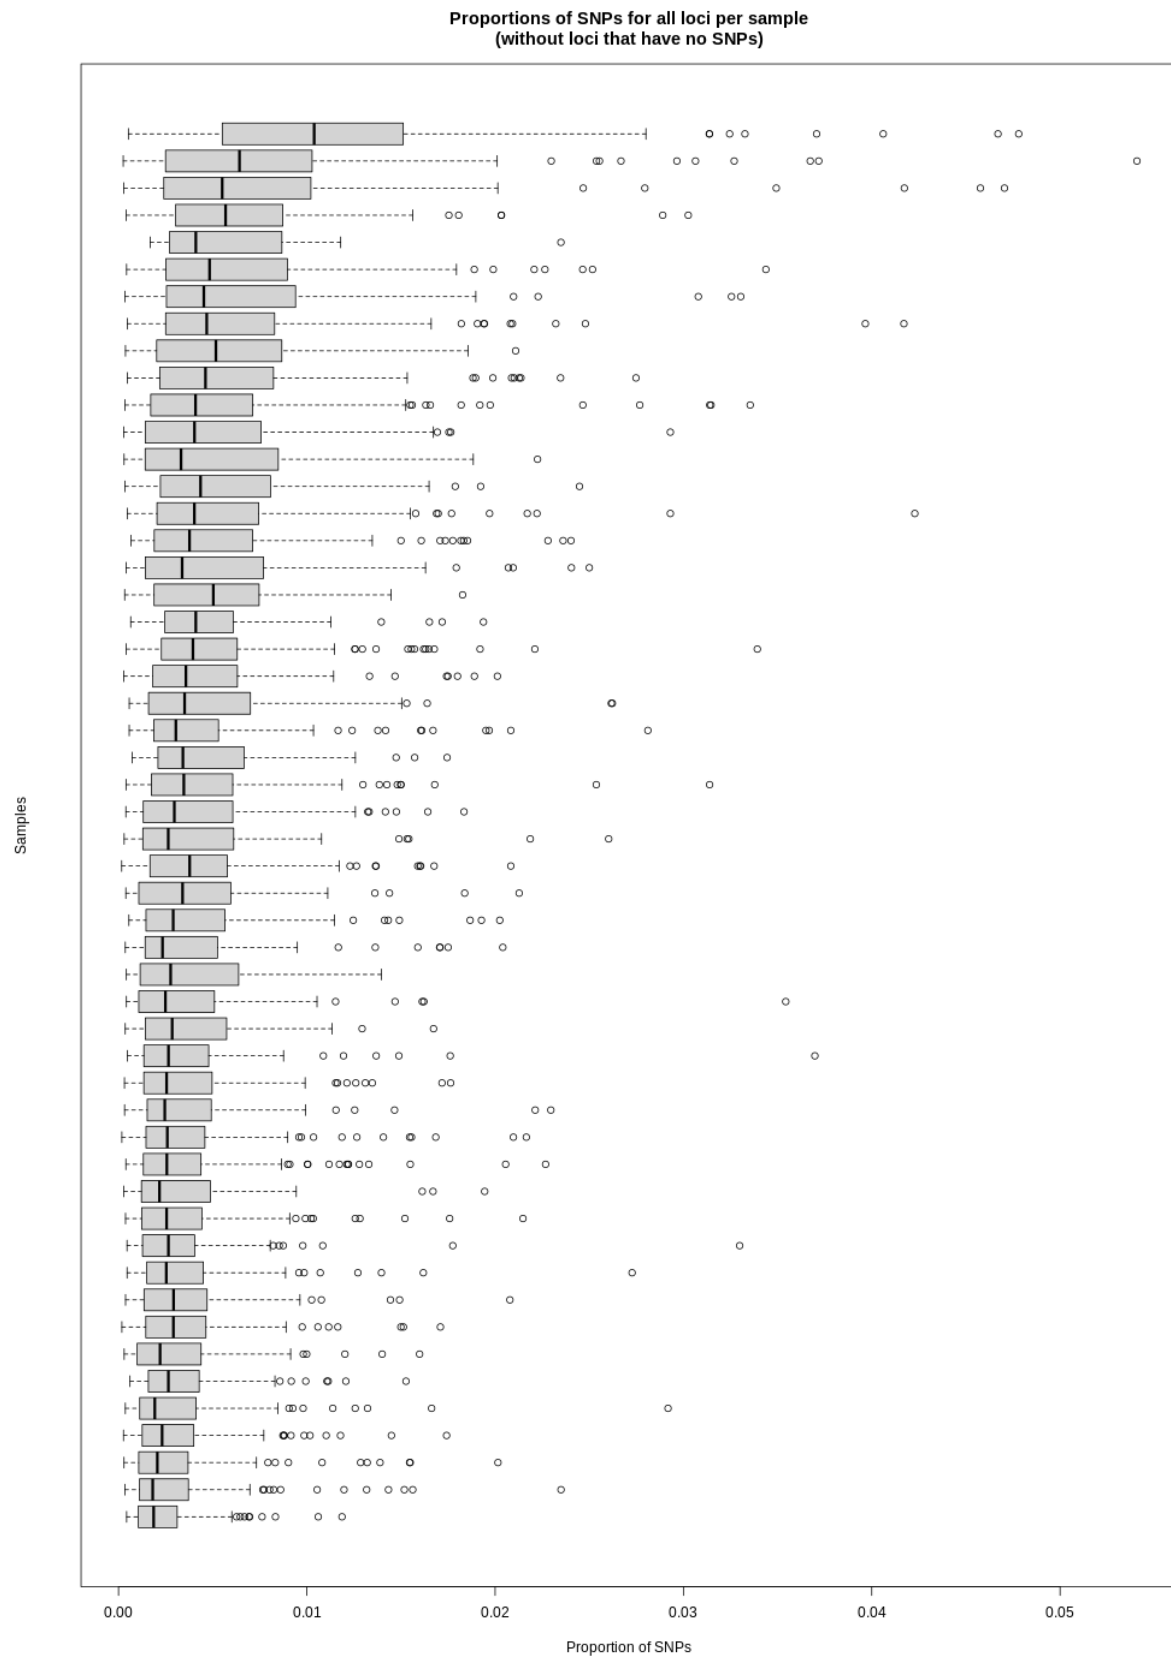

**Table S1.** Putative paralogous genes removed for each accession.

| <b>Accession</b>                        | <b>No. of removed loci</b> | <b>Name of removed loci</b>                                            |
|-----------------------------------------|----------------------------|------------------------------------------------------------------------|
| N_ampullariaXgracilis_G08101_to_ampu    | 1                          | 5460                                                                   |
| N_ampullariaXgracilis_G08101_to_grac    | 5                          | 6048, 6528, 7067, 7174, 7331                                           |
| N_ampullariaXtobaica_G08098_to_ampu     | 3                          | 5090, 5894, 6432                                                       |
| N_ampullariaXtobaica_G08098_to_jamb     | 3                          | 5469, 6068, 6216                                                       |
| N_ampullariaXtobaica_G08098_to_raja     | 5                          | 6303, 6420, 6531, 6909, 7331                                           |
| N_ampullariaXrafflesiana_G08104_to_ampu | 10                         | 4992, 5090, 5460, 5894, 6004, 6130, 6265, 6299, 6384, 7273             |
| N_ampullariaXrafflesiana_G08104_to_rafl | 6                          | 5772, 6004, 6909, 6924, 7028, 7331                                     |
| N_bellii_G08102_to_merr                 | 3                          | 4724, 6000, 7029                                                       |
| N_bellii_G08102_to_mira                 | 4                          | 4890, 5531, 6405, 7602                                                 |
| N_bicalcarataXampullaria_G08132_to_ampu | 11                         | 4893, 5090, 5296, 5434, 5562, 5594, 6072, 6779, 6859, 7331, 7602       |
| N_bicalcarataXampullaria_G08132_to_bica | 11                         | 4890, 4989, 5464, 6072, 6198, 6572, 6962, 6992, 7028, 7174, 7331       |
| N_burkeiXventricosa_G07783_to_sibu      | 10                         | 5032, 5188, 5469, 5842, 5940, 6068, 6299, 6384, 6660, 7136             |
| N_burkeiXventricosa_G07783_to_vent      | 5                          | 5032, 5842, 5940, 6068, 6779                                           |
| N_burkeiXventricosa_G07854_to_sibu      | 12                         | 5032, 5138, 5551, 5842, 5894, 5940, 5950, 5980, 6068, 6299, 6384, 7333 |

|                                           |    |                                                                                                      |
|-------------------------------------------|----|------------------------------------------------------------------------------------------------------|
| N_burkeiXventricosa_G07854_to_vent        | 7  | 5032, 5449,<br>5477, 5945,<br>6649, 6779,<br>7371                                                    |
| Nepenthes_x_hookeriana_ERR3662102_to_ampu | 6  | 5090, 5477,<br>5702, 6130,<br>6299, 7174                                                             |
| Nepenthes_x_hookeriana_ERR3662102_to_rafl | 10 | 5477, 5642,<br>6048, 6528,<br>6733, 6782,<br>6909, 7028,<br>7174, 7331                               |
| N_izumiaeXventricosa_G07866_to_jamb       | 5  | 5131, 5304,<br>5940, 6601,<br>7279                                                                   |
| N_izumiaeXventricosa_G07866_to_merr       | 6  | 5032, 5940,<br>5974, 6299,<br>6848, 7577                                                             |
| N_rafflesianaXampullaria_G08126_to_ampu   | 9  | 5090, 5343,<br>5620, 6130,<br>6265, 6299,<br>6432, 6570,<br>7028                                     |
| N_rafflesianaXampullaria_G08126_to_rafl   | 11 | 5469, 5477,<br>5639, 5699,<br>6110, 6909,<br>6924, 6992,<br>7021, 7028,<br>7331                      |
| N_truncataXventricosa_G08105_to_merr      | 4  | 5032, 5940,<br>6383, 6978                                                                            |
| N_truncataXventricosa_G08105_to_ceci      | 6  | 5940, 6048,<br>6238, 6383,<br>6527, 7602                                                             |
| N_veitchiiXeymae_G08108_to_maxi           | 8  | 4691, 5339,<br>5551, 5656,<br>5770, 6393,<br>6507, 6528                                              |
| N_veitchiiXeymae_G08108_to_veit           | 14 | 4691, 5335,<br>5460, 5464,<br>5620, 5921,<br>6439, 6458,<br>6713, 6779,<br>6792, 6914,<br>7028, 7141 |

### 3. Heterozygosity assessment

**Table S2.** Summary statistics of phased accessions before and after phasing.

| Short name                     | phased | bp     | bp of target | bp clean | bp of target clean | paralogs all | paralogs each | nloci | Locus heterozygosity | Allele divergence |
|--------------------------------|--------|--------|--------------|----------|--------------------|--------------|---------------|-------|----------------------|-------------------|
| ampullaria x gracilis          | no     | 441894 | 153          | 400056   | 162.7              | 24           | 8             | 275   | 97.1%                | 1.22%             |
| ampullaria x rafflesiana       | no     | 454423 | 157.3        | 417129   | 169.6              | 24           | 12            | 277   | 95.3%                | 1.05%             |
| ampullaria x tobaica           | no     | 314306 | 108.8        | 289633   | 117.8              | 24           | 7             | 259   | 93.8%                | 1.13%             |
| angustifolia                   | no     | 291298 | 100.9        | 270242   | 109.9              | 24           | 3             | 151   | 97.4%                | 1.51%             |
| bellii 1                       | no     | 317247 | 109.8        | 289177   | 117.6              | 24           | 7             | 257   | 91.4%                | 1.21%             |
| bicalcarata x ampullaria       | no     | 259379 | 89.8         | 236810   | 96.3               | 24           | 8             | 260   | 84.2%                | 0.79%             |
| bokorensis x ventricosa        | no     | 139944 | 48.5         | 127329   | 51.8               | 24           | 2             | 98    | 93.9%                | 1.12%             |
| boschiana x glandulifera       | no     | 145871 | 50.5         | 130469   | 53                 | 24           | 8             | 207   | 41.6%                | 0.28%             |
| burkei x ventricosa 1          | no     | 416431 | 144.2        | 378174   | 153.8              | 24           | 13            | 278   | 83.5%                | 0.36%             |
| burkei x ventricosa 2          | no     | 399549 | 138.3        | 363682   | 147.9              | 24           | 13            | 273   | 85.7%                | 0.36%             |
| burkei x ventricosa 3          | no     | 361999 | 125.3        | 328941   | 133.7              | 24           | 20            | 265   | 81.5%                | 0.32%             |
| clipeata x ventricosa          | no     | 468685 | 162.3        | 424278   | 172.5              | 24           | 6             | 274   | 95.6%                | 1.16%             |
| deaniana                       | no     | 324868 | 112.5        | 301591   | 122.6              | 24           | 11            | 153   | 81.1%                | 0.39%             |
| gymnamphora 2                  | no     | 144730 | 50.1         | 136463   | 55.5               | 24           | 0             | 78    | 94.9%                | 0.42%             |
| izumiae x ventricosa           | no     | 394144 | 136.5        | 359713   | 146.2              | 24           | 10            | 267   | 95.1%                | 1.08%             |
| kamptiana 1                    | no     | 440586 | 152.5        | 399435   | 162.4              | 24           | 11            | 284   | 95.8%                | 1.27%             |
| lowii x campanulata            | no     | 451830 | 156.4        | 410562   | 166.9              | 24           | 13            | 282   | 94.3%                | 0.87%             |
| rafflesiana x ampullaria 2     | no     | 584706 | 202.4        | 535631   | 217.8              | 24           | 12            | 277   | 94.6%                | 1.24%             |
| rafflesiana x ampullaria 1     | no     | 424810 | 147.1        | 386986   | 157.3              | 24           | 7             | 280   | 95.7%                | 0.98%             |
| rigidifolia                    | no     | 501658 | 173.7        | 456628   | 185.7              | 24           | 15            | 268   | 89.2%                | 0.47%             |
| sanguinea 2                    | no     | 582558 | 201.7        | 527250   | 214.4              | 24           | 12            | 268   | 82.5%                | 0.41%             |
| sanguinea 1                    | no     | 408434 | 141.4        | 370059   | 150.5              | 24           | 12            | 274   | 83.9%                | 0.44%             |
| truncata x ventricosa          | no     | 310700 | 107.6        | 286291   | 116.4              | 24           | 4             | 258   | 92.6%                | 1.07%             |
| veitchii 1                     | no     | 419359 | 145.2        | 382266   | 155.4              | 24           | 10            | 277   | 87.0%                | 0.39%             |
| veitchii x eymae               | no     | 534053 | 184.9        | 487548   | 198.2              | 24           | 7             | 280   | 92.1%                | 0.56%             |
| xiphioides 1                   | no     | 483298 | 167.3        | 436980   | 177.7              | 24           | 11            | 275   | 89.8%                | 0.50%             |
| ampullaria x gracilis to ampu  | yes    | 317219 | 109.8        | 286055   | 137.3              | 24           | 2             | 227   | 37.4%                | 0.22%             |
| ampullaria x gracilis to graci | yes    | 341075 | 118.1        | 302242   | 145                | 24           | 7             | 236   | 55.5%                | 0.39%             |

|                                  |     |        |       |        |       |    |    |     |       |       |
|----------------------------------|-----|--------|-------|--------|-------|----|----|-----|-------|-------|
| ampullaria x rafflesiana to ampu | yes | 332348 | 115.1 | 300698 | 144.3 | 24 | 10 | 233 | 76.4% | 0.49% |
| ampullaria x rafflesiana to rafl | yes | 318397 | 110.2 | 286496 | 137.5 | 24 | 7  | 223 | 58.3% | 0.42% |
| ampullaria x tobaica to ampu     | yes | 234212 | 81.1  | 212290 | 101.9 | 24 | 4  | 216 | 40.7% | 0.19% |
| ampullaria x tobaica to toba     | yes | 236692 | 82    | 210983 | 101.2 | 24 | 6  | 209 | 43.1% | 0.31% |
| angustifolia to graci            | yes | 456125 | 157.9 | 400357 | 192.1 | 24 | 7  | 242 | 89.7% | 1.00% |
| angustifolia to hisp             | yes | 143847 | 49.8  | 131617 | 63.2  | 24 | 1  | 78  | 55.1% | 0.32% |
| bellii 1 to merr                 | yes | 232358 | 80.5  | 206768 | 99.2  | 24 | 2  | 208 | 44.2% | 0.31% |
| bellii 1 to mira                 | yes | 233855 | 81    | 212580 | 102   | 24 | 2  | 214 | 38.8% | 0.16% |
| bicalcarata x ampullaria to ampu | yes | 155681 | 53.9  | 139554 | 67    | 24 | 11 | 200 | 52.5% | 0.23% |
| bicalcarata x ampullaria to bica | yes | 166449 | 57.6  | 144803 | 69.5  | 24 | 11 | 191 | 61.8% | 0.34% |
| bokorensis x ventricosa to sura  | yes | 267788 | 92.7  | 239237 | 114.8 | 24 | 7  | 221 | 52.9% | 0.17% |
| bokorensis x ventricosa to vent  | yes | 283542 | 98.2  | 251476 | 120.7 | 24 | 3  | 233 | 65.7% | 0.32% |
| boschiana x glandulifera to glan | yes | 102601 | 35.5  | 93771  | 34.9  | 24 | 4  | 173 | 34.1% | 0.17% |
| boschiana x glandulifera to vent | yes | 30734  | 10.6  | 24389  | 9.1   | 24 | 1  | 66  | 15.2% | 0.14% |
| burkei x ventricosa 1 to sibu    | yes | 285489 | 98.8  | 259083 | 124.3 | 24 | 10 | 224 | 63.8% | 0.17% |
| burkei x ventricosa 1 to vent    | yes | 234530 | 81.2  | 203665 | 97.7  | 24 | 6  | 214 | 57.5% | 0.21% |
| burkei x ventricosa 2 to sibu    | yes | 271156 | 93.9  | 244826 | 117.5 | 24 | 12 | 223 | 65.5% | 0.17% |
| burkei x ventricosa 2 to vent    | yes | 216889 | 75.1  | 186209 | 89.4  | 24 | 7  | 208 | 59.1% | 0.21% |
| burkei x ventricosa 3 to sibu    | yes | 223393 | 77.3  | 202710 | 97.3  | 24 | 10 | 213 | 66.2% | 0.19% |
| burkei x ventricosa 3 to vent    | yes | 179313 | 62.1  | 157045 | 75.4  | 24 | 8  | 193 | 59.1% | 0.20% |
| clipeata x ventricosa to vent    | yes | 334173 | 115.7 | 296801 | 142.4 | 24 | 3  | 233 | 57.5% | 0.32% |
| clipeata x ventricosa to voge    | yes | 378277 | 131   | 334223 | 160.4 | 24 | 8  | 239 | 54.0% | 0.21% |
| deaniana to anip                 | yes | 227131 | 78.6  | 196016 | 94.1  | 24 | 7  | 112 | 79.5% | 0.36% |
| deaniana to grafl                | yes | 277445 | 96.1  | 246220 | 118.1 | 24 | 5  | 193 | 54.9% | 0.21% |
| gymnamphora 2 to gymn            | yes | 384390 | 133.1 | 345136 | 165.6 | 24 | 7  | 234 | 77.8% | 0.27% |



|                                    |     |        |       |        |       |    |    |     |       |       |
|------------------------------------|-----|--------|-------|--------|-------|----|----|-----|-------|-------|
| gymnamphora 2 to jamb              | yes | 253561 | 87.8  | 218770 | 105   | 24 | 11 | 201 | 34.8% | 0.10% |
| izumiae x ventricosa to jamb       | yes | 295873 | 102.4 | 265710 | 127.5 | 24 | 5  | 225 | 25.3% | 0.10% |
| izumiae x ventricosa to vent       | yes | 296583 | 102.7 | 264430 | 126.9 | 24 | 6  | 231 | 42.9% | 0.17% |
| kamptiana 1 to mira                | yes | 322598 | 111.7 | 292553 | 140.4 | 24 | 4  | 233 | 51.5% | 0.29% |
| kamptiana 1 to sura                | yes | 323938 | 112.2 | 286684 | 137.6 | 24 | 5  | 229 | 38.0% | 0.21% |
| lowii x campanulata to camp        | yes | 368558 | 127.6 | 327968 | 157.4 | 24 | 9  | 241 | 88.0% | 0.48% |
| lowii x campanulata to faiz        | yes | 259916 | 90    | 226813 | 108.8 | 24 | 5  | 223 | 31.4% | 0.13% |
| rafflesiana x ampullaria 2 to ampu | yes | 436932 | 151.3 | 391650 | 187.9 | 24 | 6  | 233 | 57.1% | 0.40% |
| rafflesiana x ampullaria 2 to rafl | yes | 450911 | 156.1 | 401449 | 192.6 | 24 | 10 | 223 | 65.5% | 0.52% |
| rafflesiana x ampullaria 1 to ampu | yes | 279573 | 96.8  | 252545 | 121.2 | 24 | 9  | 231 | 78.4% | 0.45% |
| rafflesiana x ampullaria 1 to rafl | yes | 257648 | 89.2  | 228062 | 109.4 | 24 | 12 | 216 | 69.0% | 0.40% |
| rigidifolia to spec                | yes | 365741 | 126.6 | 323963 | 155.5 | 24 | 13 | 233 | 79.8% | 0.38% |
| rigidifolia to sura                | yes | 230881 | 79.9  | 205167 | 98.4  | 24 | 6  | 169 | 56.8% | 0.19% |
| sanguinea 2 to grll                | yes | 435859 | 150.9 | 390890 | 187.6 | 24 | 9  | 229 | 76.4% | 0.35% |
| sanguinea 2 to sura                | yes | 281347 | 97.4  | 245482 | 117.8 | 24 | 6  | 177 | 65.5% | 0.27% |
| sanguinea 1 to grll                | yes | 302323 | 104.7 | 272679 | 130.8 | 24 | 9  | 232 | 78.5% | 0.36% |
| sanguinea 1 to sura                | yes | 173626 | 60.1  | 147197 | 70.6  | 24 | 6  | 177 | 61.6% | 0.33% |
| truncata x ventricosa to pelt      | yes | 224000 | 77.6  | 199367 | 95.7  | 24 | 1  | 210 | 27.1% | 0.10% |
| truncata x ventricosa to vent      | yes | 223210 | 77.3  | 197809 | 94.9  | 24 | 4  | 212 | 31.6% | 0.12% |
| veitchii 1 to veit                 | yes | 254492 | 88.1  | 224300 | 107.6 | 24 | 6  | 212 | 70.3% | 0.29% |
| veitchii 1 to voge                 | yes | 269087 | 93.2  | 238511 | 114.4 | 24 | 5  | 223 | 68.2% | 0.25% |
| veitchii x eymae to maxi           | yes | 321083 | 111.2 | 291582 | 139.9 | 24 | 7  | 224 | 49.6% | 0.19% |
| veitchii x eymae to veit           | yes | 376664 | 130.4 | 334723 | 160.6 | 24 | 12 | 239 | 69.5% | 0.24% |
| xiphioides 1 to gymn               | yes | 377272 | 130.6 | 339162 | 162.7 | 24 | 11 | 235 | 76.2% | 0.27% |
| xiphioides 1 to jamb               | yes | 243540 | 84.3  | 208636 | 100.1 | 24 | 4  | 200 | 30.0% | 0.11% |
