# Supplementary figures and images for: HybPhaser: A workflow for the detection and phasing of hybrids in target capture data sets
Source: PubMed Central journal article supplement — Appl Plant Sci. 2021 Jul 21;9(7):10.1002/aps3.11441. doi: 10.1002/aps3.11441 (PMC8312746; doi:10.1002/aps3.11441), 2021-07-21

**APPENDIX S9.** Gene tree summary phylogeny from normal data set (framework phylogeny).

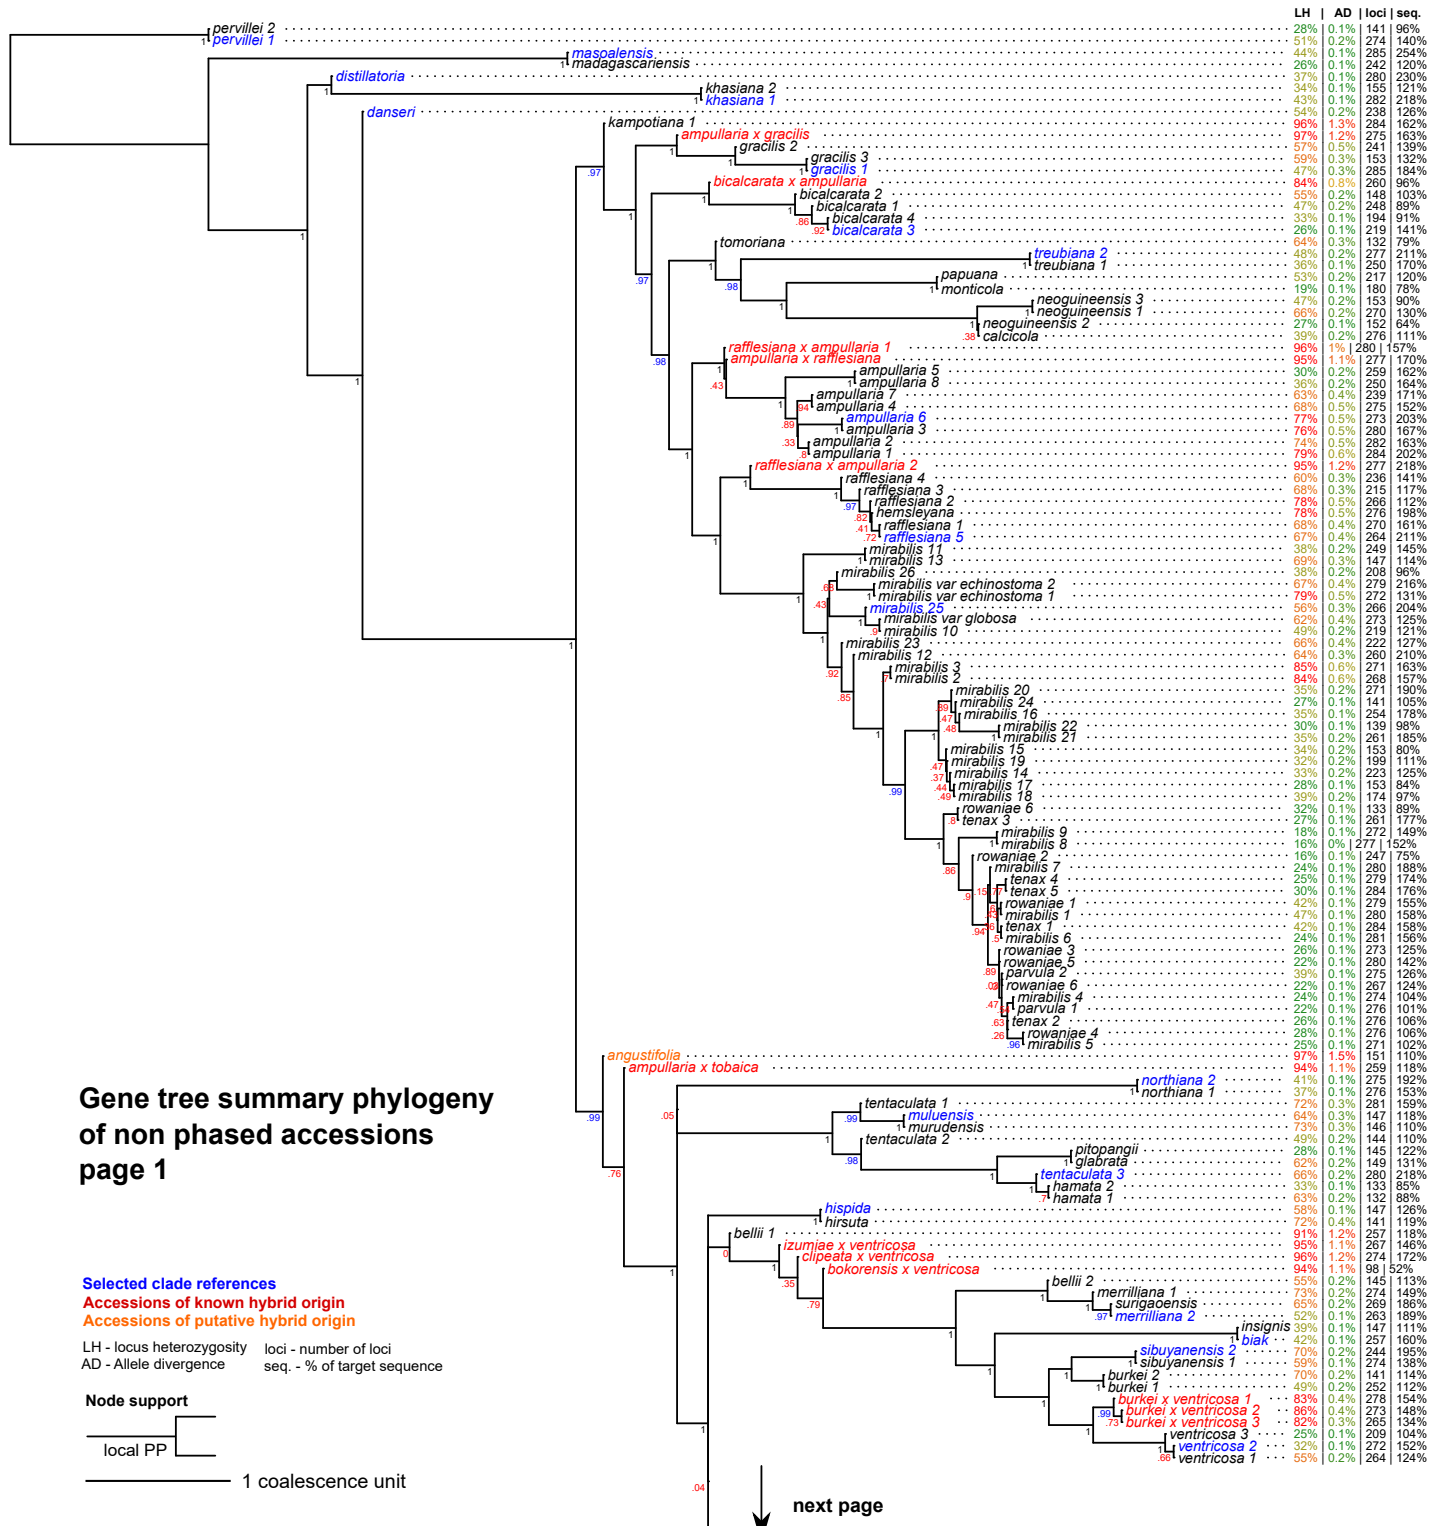

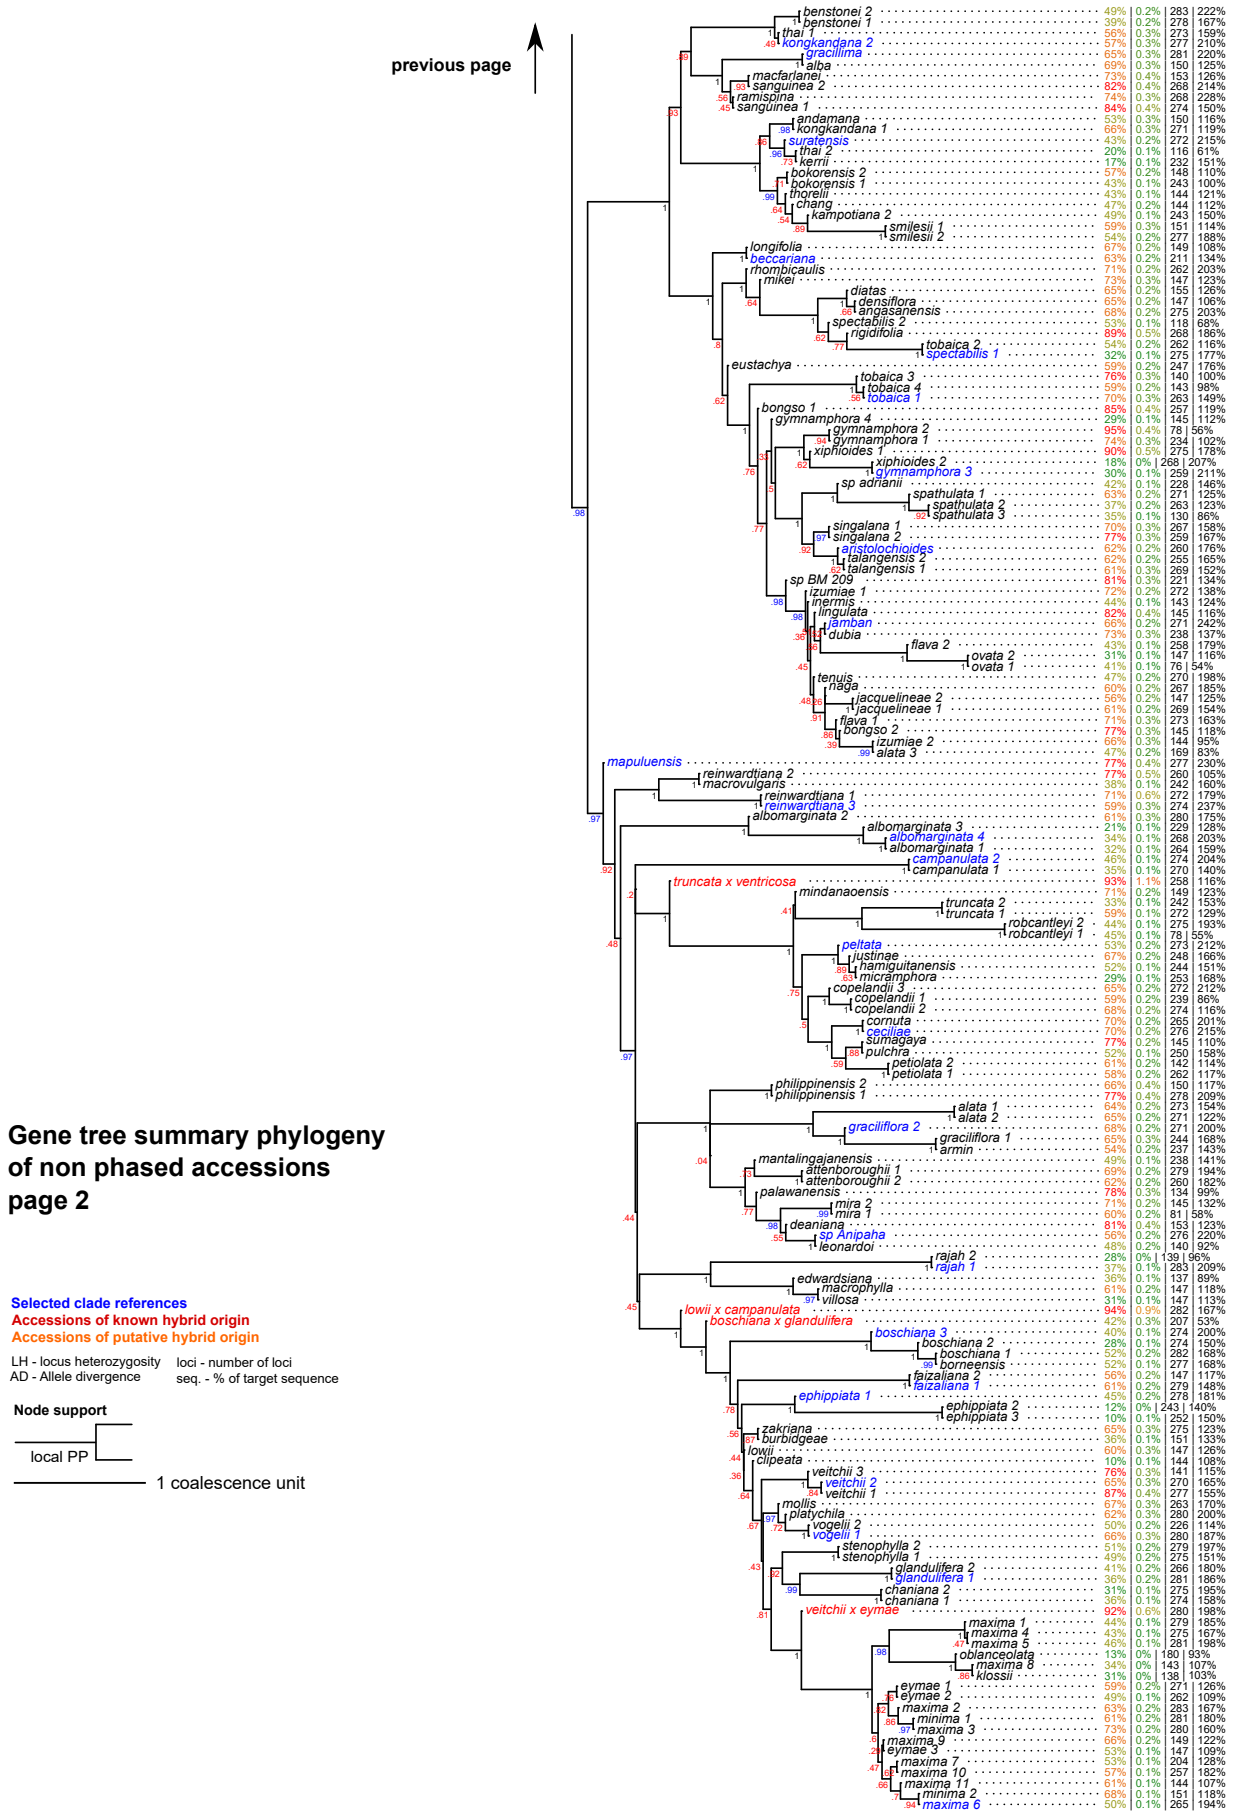

Supplement: APS3-9--s006.pdf [file APS3-9--s006.pdf]
